# Supplementary material for: Obstetric Volume and Severe Maternal Morbidity Among Low-Risk and Higher-Risk Patients Giving Birth at Rural and Urban US Hospitals
Source: PubMed Central journal article supplement (PMC10290751; doi:10.1001/jamahealthforum.2023.2110), 2023-06-24
Supplement: jamahealthforum-e232110-s001.pdf [file jamahealthforum-e232110-s001.pdf]

## Supplemental Online Content

Kozhimannil KB, Leonard SA, Handley SC, et al. Obstetric volume and severe maternal morbidity among low-risk and higher-risk patients giving birth at rural and urban US hospitals. *JAMA Health Forum*. 2023;4(6):e232110. doi:10.1001/jamahealthforum.2023.2110

**eFigure:** Study population flowchart

**eTable 1:** Associations between annual birth volume category and SMM (with transfusion) for hospitals in urban and rural U.S. counties

**eTable 2:** Associations between annual birth volume category and SMM for hospitals in urban and rural U.S. counties, alternate birth volume categories

**eTable 3:** Associations between annual birth volume category and SMM for hospitals with in urban and rural U.S. counties, stratified by state

**eTable 4:** Associations between annual birth volume category and SMM for hospitals in urban and rural U.S. counties, complete case analysis (excluding missing data)

**eTable 5:** Associations between annual birth volume category and SMM for hospitals in urban and rural U.S. counties, excluding patients with transfer indications

**eTable 6:** Characteristics of obstetric patients at hospitals in urban US counties, by birth volume category

**eTable 7:** Characteristics of obstetric patients at hospitals in rural US counties, by birth volume category

**eTable 8:** Characteristics of obstetric patients in the study population, based on state of residence

This supplemental material has been provided by the authors to give readers additional information about their work.

eFigure: Study population flowchart

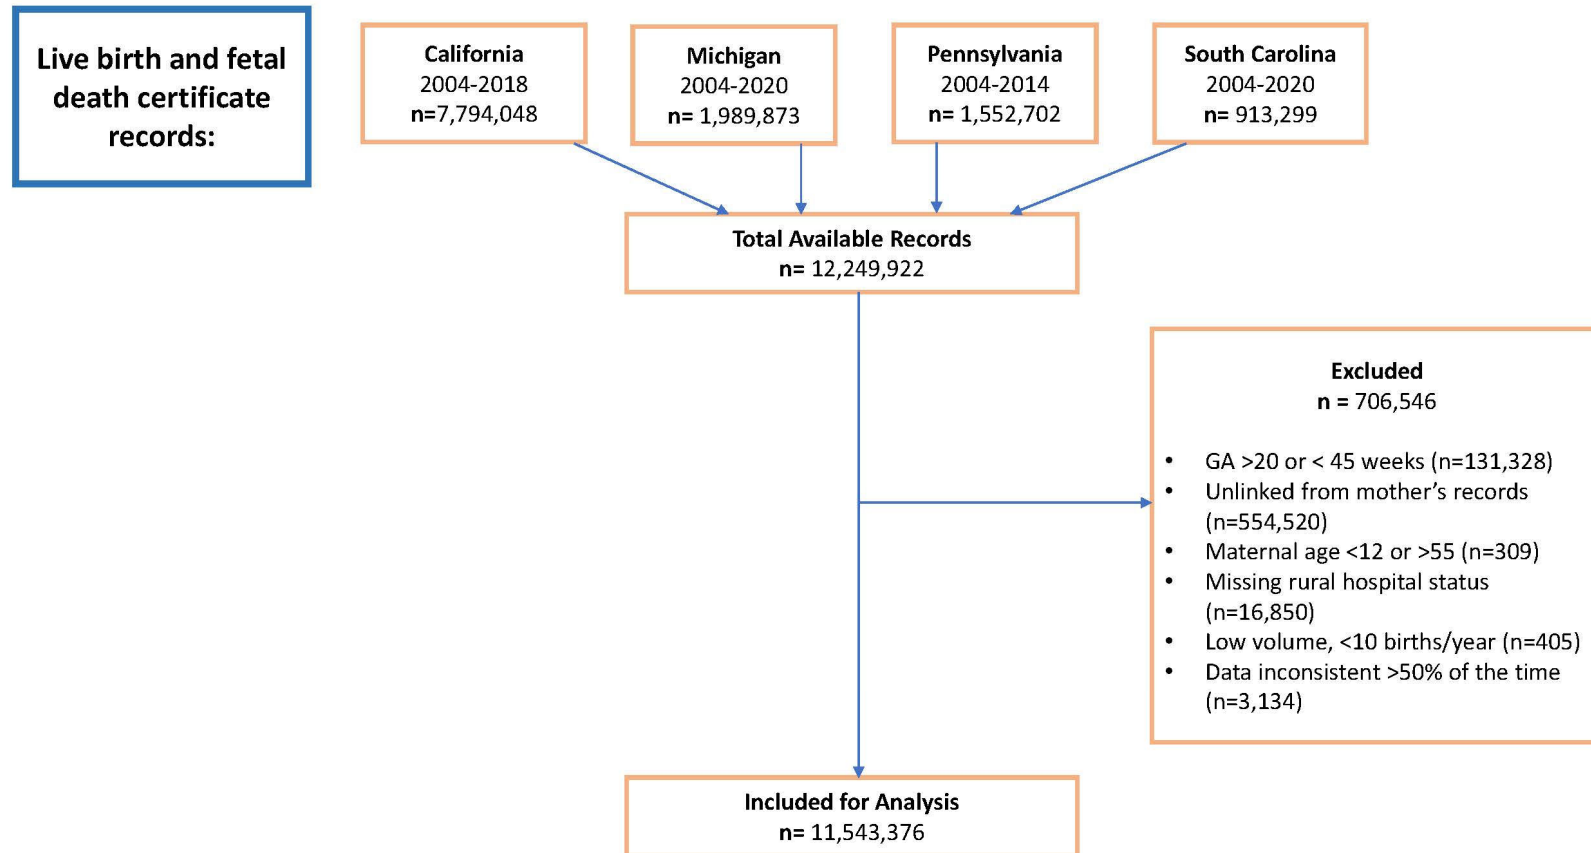

**eTable 1: Associations between annual birth volume category and SMM (with transfusion) for hospitals in urban and rural U.S. counties**

|                                | SMM Incidence<br>n (%) | Unadjusted RR<br>(95% CI) | Adjusted RR<br>(95% CI) |
|--------------------------------|------------------------|---------------------------|-------------------------|
| <b>Urban Counties</b>          |                        |                           |                         |
| Low (10-500 births)            | 3637 (1.39%)           | 0.89 (0.75-1.04)          | 1.3 (1.12-1.5)          |
| Medium (501-1000 births)       | 11846 (1.38%)          | 0.87 (0.76-1.01)          | 1.12 (1.02-1.24)        |
| Medium-high (1001-2000 births) | 37170 (1.47%)          | 0.93 (0.84-1.03)          | 1.09 (1-1.17)           |
| High (>2000 births)            | 115473 (1.57%)         | REF                       | REF                     |
|                                |                        |                           |                         |
| <b>Rural Counties</b>          |                        |                           |                         |
| Low (10-110 births)            | 159 (1.94%)            | 1.59 (1.03-2.47)          | 1.79 (1.24-2.6)         |
| Medium (111-240 births)        | 849 (1.43%)            | 1.16 (0.91-1.49)          | 1.34 (1.07-1.67)        |
| Medium-high (241-460 births)   | 2728 (1.56%)           | 1.27 (1.02-1.58)          | 1.25 (0.99-1.59)        |
| High (>460 births)             | 3419 (1.23%)           | REF                       | REF                     |

**eTable 2: Associations between annual birth volume category and SMM for hospitals in urban and rural U.S. counties, alternate birth volume categories**

|                           | Severe Maternal Morbidity Rate | Unadjusted RR (95% CI) | Adjusted RR (95% CI) |
|---------------------------|--------------------------------|------------------------|----------------------|
| <b>Urban</b>              |                                |                        |                      |
| Q1-Low: 11-767            | 3692 (0.55%)                   | 0.77 (0.66-0.89)       | 1.05 (0.95-1.16)     |
| Q2-Medium: 768-1521       | 9774 (0.6%)                    | 0.83 (0.73-0.95)       | 1.04 (0.95-1.14)     |
| Q3-Medium-High: 1521-2602 | 21105 (0.72%)                  | 1.00 (0.89-1.12)       | 1.09 (1.00-1.18)     |
| Q4-High: > 2602           | 41636 (0.72%)                  | REF                    | REF                  |
|                           |                                |                        |                      |
| <b>Rural</b>              |                                |                        |                      |
| Q1-Low: 11-207            | 243 (0.53%)                    | 1.14 (0.90-1.43)       | 1.34 (1.11-1.63)     |
| Q2-Medium: 208-320        | 529 (0.6%)                     | 1.27 (1.04-1.55)       | 1.35 (1.12-1.62)     |
| Q3-Medium-High: 321-486   | 682 (0.52%)                    | 1.10 (0.88-1.39)       | 1.22 (0.99-1.52)     |
| Q4-High: > 486            | 1198 (0.47%)                   | REF                    | REF                  |

**eTable 3: Associations between annual birth volume category and SMM for hospitals with in urban and rural U.S. counties, stratified by state**

|                   |                   | Severe Maternal Morbidity Rate | Unadjusted RR (95% CI) | Adjusted RR (95% CI) |
|-------------------|-------------------|--------------------------------|------------------------|----------------------|
| <b>CA</b>         | <b>Urban</b>      |                                |                        |                      |
|                   | Volume category 1 | 621 (0.54%)                    | 0.80 (0.67-0.96)       | 1.01 (0.87-1.17)     |
|                   | Volume category 2 | 2205 (0.53%)                   | 0.79 (0.61-1.02)       | 0.91 (0.77-1.07)     |
|                   | Volume category 3 | 9670 (0.65%)                   | 0.96 (0.83-1.12)       | 1.02 (0.93-1.12)     |
|                   | Volume category 4 | 35577 (0.68%)                  | REF                    | REF                  |
|                   |                   |                                |                        |                      |
|                   | <b>Rural</b>      |                                |                        |                      |
|                   | Volume category 1 | 22 (0.89%)                     | 2.03 (1.04-3.94)       | 2.17 (1.30-3.64)     |
|                   | Volume category 2 | 101 (0.57%)                    | 1.29 (0.80-2.10)       | 1.37 (0.90-2.09)     |
|                   | Volume category 3 | 180 (0.61%)                    | 1.38 (1.00-1.92)       | 1.35 (0.98-1.89)     |
| Volume category 4 | 225 (0.44%)       | REF                            | REF                    |                      |
| <b>MI</b>         | <b>Urban</b>      |                                |                        |                      |
|                   | Volume category 1 | 166 (0.39%)                    | 0.45 (0.33-0.60)       | 0.91 (0.74-1.13)     |
|                   | Volume category 2 | 1283 (0.65%)                   | 0.75 (0.51-1.10)       | 1.18 (0.89-1.57)     |
|                   | Volume category 3 | 2884 (0.66%)                   | 0.76 (0.59-0.97)       | 1.10 (0.96-1.27)     |
|                   | Volume category 4 | 8937 (0.87%)                   | REF                    | REF                  |
|                   |                   |                                |                        |                      |
|                   | <b>Rural</b>      |                                |                        |                      |
|                   | Volume category 1 | 21 (0.64%)                     | 1.35 (0.76-2.37)       | 1.64 (0.93-2.88)     |
|                   | Volume category 2 | 107 (0.49%)                    | 1.03 (0.69-1.54)       | 1.39 (0.98-1.98)     |
|                   | Volume category 3 | 450 (0.51%)                    | 1.07 (0.74-1.55)       | 1.24 (0.85-1.82)     |
| Volume category 4 | 490 (0.48%)       | REF                            | REF                    |                      |

|           |                   |              |                  |                  |
|-----------|-------------------|--------------|------------------|------------------|
| <b>PA</b> | <b>Urban</b>      |              |                  |                  |
|           | Volume category 1 | 316 (0.46%)  | 0.58 (0.45-0.76) | 0.93 (0.71-1.22) |
|           | Volume category 2 | 881 (0.53%)  | 0.68 (0.54-0.85) | 1.05 (0.85-1.29) |
|           | Volume category 3 | 2548 (0.65%) | 0.83 (0.66-1.04) | 1.03 (0.88-1.20) |
|           | Volume category 4 | 5123 (0.78%) | REF              | REF              |
|           |                   |              |                  |                  |
|           | <b>Rural</b>      |              |                  |                  |
|           | Volume category 1 | 7 (0.65%)    | 1.68 (0.75-3.78) | 1.75 (0.84-3.61) |
|           | Volume category 2 | 85 (0.55%)   | 1.41 (0.85-2.32) | 1.46 (0.91-2.36) |
|           | Volume category 3 | 172 (0.53%)  | 1.35 (1.03-1.76) | 1.50 (1.12-2.02) |
|           | Volume category 4 | 234 (0.39%)  | REF              | REF              |
| <b>SC</b> | <b>Urban</b>      |              |                  |                  |
|           | Volume category 1 | 213 (0.6%)   | 0.66 (0.43-0.99) | 1.11 (0.84-1.47) |
|           | Volume category 2 | 539 (0.64%)  | 0.70 (0.47-1.05) | 1.08 (0.83-1.40) |
|           | Volume category 3 | 1374 (0.62%) | 0.68 (0.48-0.97) | 0.93 (0.76-1.13) |
|           | Volume category 4 | 3870 (0.91%) | REF              | REF              |
|           |                   |              |                  |                  |
|           | <b>Rural</b>      |              |                  |                  |
|           | Volume category 1 | 7 (0.52%)    | 0.92 (0.33-2.57) | 0.99 (0.37-2.65) |
|           | Volume category 2 | 31 (0.73%)   | 1.30 (0.85-2.00) | 1.27 (0.86-1.88) |
|           | Volume category 3 | 165 (0.68%)  | 1.21 (0.94-1.56) | 1.12 (0.94-1.33) |
|           | Volume category 4 | 355 (0.56%)  | REF              | REF              |

**eTable 4: Associations between annual birth volume category and SMM for hospitals in urban and rural U.S. counties, complete case analysis (excluding missing data)**

|                                | SMM Incidence<br>n (%) | Unadjusted RR<br>(95% CI) | Adjusted RR<br>(95% CI) |
|--------------------------------|------------------------|---------------------------|-------------------------|
| <b>Urban Counties</b>          |                        |                           |                         |
| Low (10-500 births)            | 1257 (0.49%)           | 0.68 (0.60-0.77)          | 0.98 (0.88-1.10)        |
| Medium (501-1000 births)       | 4755 (0.56%)           | 0.78 (0.66-0.93)          | 1.00 (0.89-1.13)        |
| Medium-high (1001-2000 births) | 15808 (0.64%)          | 0.89 (0.80-1.00)          | 1.02 (0.96-1.10)        |
| High (>2000 births)            | 50944 (0.72%)          | REF                       | REF                     |
| <b>Rural Counties</b>          |                        |                           |                         |
| Low (10-110 births)            | 52 (0.66%)             | 1.43 (0.96-2.12)          | 1.63 (1.13-2.35)        |
| Medium (111-240 births)        | 311 (0.53%)            | 1.15 (0.89-1.49)          | 1.33 (1.06-1.68)        |
| Medium-high (241-460 births)   | 931 (0.54%)            | 1.16 (0.95-1.43)          | 1.24 (1.03-1.50)        |
| High (>460 births)             | 274316 (0.46%)         | REF                       | REF                     |

**eTable 5: Associations between annual birth volume category and SMM for hospitals in urban and rural U.S. counties, excluding patients with transfer indications**

|                                | SMM Incidence<br>n (%) | Unadjusted RR<br>(95% CI) | Adjusted RR<br>(95% CI) |
|--------------------------------|------------------------|---------------------------|-------------------------|
| <b>Urban Counties</b>          |                        |                           |                         |
| Low (10-500 births)            | 1241 (0.48%)           | 0.67 (0.59-0.77)          | 0.97 (0.87-1.08)        |
| Medium (501-1000 births)       | 4726 (0.55%)           | 0.78 (0.66-0.92)          | 1.00 (0.89-1.12)        |
| Medium-high (1001-2000 births) | 15849 (0.63%)          | 0.89 (0.80-0.99)          | 1.02 (0.95-1.09)        |
| High (>2000 births)            | 51630 (0.70%)          | REF                       | REF                     |
|                                |                        |                           |                         |
| <b>Rural Counties</b>          |                        |                           |                         |
| Low (10-110 births)            | 54 (0.66%)             | 1.47 (1.01-2.15)          | 1.65 (1.14-2.38)        |
| Medium (111-240 births)        | 311 (0.52%)            | 1.16 (0.90-1.50)          | 1.36 (1.09-1.69)        |
| Medium-high (241-460 births)   | 917 (0.52%)            | 1.16 (0.94-1.44)          | 1.24 (1.02-1.50)        |
| High (>460 births)             | 1248 (0.45%)           | REF                       | REF                     |



**eTable 6: Characteristics of obstetric patients at hospitals in urban US counties, by birth volume category**

|                                   | Total              | Low              | Medium           | Medium-High        | High               | p-value |
|-----------------------------------|--------------------|------------------|------------------|--------------------|--------------------|---------|
|                                   | N=11,023,423       | N=261,553        | N=860,892        | N=2,535,466        | N=7,365,512        |         |
| Maternal Age at Admission (years) | 28.48 (6.15)       | 27.17 (6.01)     | 27.83 (6.03)     | 28.33 (6.11)       | 28.66 (6.17)       | <0.001  |
| Maternal Age Category             |                    |                  |                  |                    |                    | <0.001  |
| <25                               | 3,138,417 (28.47%) | 96,269 (36.81%)  | 276,574 (32.13%) | 741,445 (29.24%)   | 2,024,129 (27.48%) |         |
| 25-34                             | 5,933,544 (53.83%) | 131,758 (50.38%) | 456,750 (53.06%) | 1,363,857 (53.79%) | 3,981,179 (54.05%) |         |
| >=35                              | 1,951,462 (17.70%) | 33,526 (12.82%)  | 127,568 (14.82%) | 430,164 (16.97%)   | 1,360,204 (18.47%) |         |
| Maternal Race/Ethnicity           |                    |                  |                  |                    |                    | <0.001  |
| AI/AN                             | 25,897 (0.23%)     | 897 (0.34%)      | 1,863 (0.22%)    | 6,482 (0.26%)      | 16,655 (0.23%)     |         |
| Asian                             | 1,108,997 (10.06%) | 9,677 (3.70%)    | 49,995 (5.81%)   | 206,924 (8.16%)    | 842,401 (11.44%)   |         |
| Black                             | 1,169,224 (10.61%) | 20,657 (7.90%)   | 86,857 (10.09%)  | 284,881 (11.24%)   | 776,829 (10.55%)   |         |
| Hispanic                          | 3,984,383 (36.14%) | 69,570 (26.60%)  | 250,068 (29.05%) | 827,003 (32.62%)   | 2,837,742 (38.53%) |         |
| Pacific Islander                  | 31,566 (0.29%)     | 418 (0.16%)      | 1,869 (0.22%)    | 7,423 (0.29%)      | 21,856 (0.30%)     |         |
| White                             | 4,422,185 (40.12%) | 153,257 (58.60%) | 447,102 (51.93%) | 1,135,736 (44.79%) | 2,686,090 (36.47%) |         |
| Other/Multiple                    | 269,157 (2.44%)    | 6,805 (2.60%)    | 22,227 (2.58%)   | 62,553 (2.47%)     | 177,572 (2.41%)    |         |
| Missing                           | 12,014 (0.11%)     | 272 (0.10%)      | 911 (0.11%)      | 4,464 (0.18%)      | 6,367 (0.09%)      |         |
| Maternal Education Category       |                    |                  |                  |                    |                    | <0.001  |
| Missing                           | 307,542 (2.79%)    | 3,867 (1.48%)    | 11,739 (1.36%)   | 54,937 (2.17%)     | 236,999 (3.22%)    |         |
| No HS                             | 601,144 (5.45%)    | 13,733 (5.25%)   | 45,962 (5.34%)   | 136,403 (5.38%)    | 405,046 (5.50%)    |         |
| Some HS                           | 1,524,889 (13.83%) | 45,528 (17.41%)  | 127,519 (14.81%) | 350,831 (13.84%)   | 1,001,011 (13.59%) |         |
| HS Degree                         | 2,744,173 (24.89%) | 81,813 (31.28%)  | 245,985 (28.57%) | 651,751 (25.71%)   | 1,764,624 (23.96%) |         |
| Some College                      | 2,781,434 (25.23%) | 70,044 (26.78%)  | 238,755 (27.73%) | 656,361 (25.89%)   | 1,816,274 (24.66%) |         |
| 4 Yr College                      | 1,928,154 (17.49%) | 32,386 (12.38%)  | 128,815 (14.96%) | 439,626 (17.34%)   | 1,327,327 (18.02%) |         |
| >4 Yrs College                    | 1,136,087 (10.31%) | 14,182 (5.42%)   | 62,117 (7.22%)   | 245,557 (9.68%)    | 814,231 (11.05%)   |         |
| Maternal Payor Category           |                    |                  |                  |                    |                    | <0.001  |
| Missing                           | 1,283 (0.01%)      | 68 (0.03%)       | 97 (0.01%)       | 627 (0.02%)        | 491 (0.01%)        |         |
| Private                           | 5,581,410 (50.63%) | 106,618 (40.76%) | 390,035 (45.31%) | 1,251,135 (49.35%) | 3,833,622 (52.05%) |         |

|                                           |                    |                  |                  |                    |                    |        |
|-------------------------------------------|--------------------|------------------|------------------|--------------------|--------------------|--------|
| Government                                | 5,090,005 (46.17%) | 145,588 (55.66%) | 439,435 (51.04%) | 1,188,385 (46.87%) | 3,316,597 (45.03%) |        |
| Self Pay                                  | 239,456 (2.17%)    | 6,817 (2.61%)    | 20,328 (2.36%)   | 59,335 (2.34%)     | 152,976 (2.08%)    |        |
| Other                                     | 111,269 (1.01%)    | 2,462 (0.94%)    | 10,997 (1.28%)   | 35,984 (1.42%)     | 61,826 (0.84%)     |        |
| Comorbidity Count                         | 0.81 (1.06)        | 0.69 (0.93)      | 0.75 (0.99)      | 0.78 (1.03)        | 0.84 (1.09)        | <0.001 |
| Comorbidity score for SMM                 | 3.87 (6.36)        | 3.05 (5.17)      | 3.36 (5.62)      | 3.62 (6.02)        | 4.04 (6.58)        | <0.001 |
| Comorbidity score for non-transfusion SMM | 4.81 (8.57)        | 3.65 (6.79)      | 4.04 (7.44)      | 4.48 (8.08)        | 5.05 (8.90)        | <0.001 |
| High Risk: Comorbidity Count >=1          |                    |                  |                  |                    |                    | <0.001 |
| Low Risk                                  | 5,532,658 (50.19%) | 140,526 (53.73%) | 447,791 (52.01%) | 1,297,779 (51.19%) | 3,646,562 (49.51%) |        |
| 1 or more comorbidities                   | 5,490,765 (49.81%) | 121,027 (46.27%) | 413,101 (47.99%) | 1,237,687 (48.81%) | 3,718,950 (50.49%) |        |

**eTable 7: Characteristics of obstetric patients at hospitals in rural US counties, by birth volume category**

|                                   | Total            | Low            | Medium          | Medium-High      | High             | p-value |
|-----------------------------------|------------------|----------------|-----------------|------------------|------------------|---------|
|                                   | N=519,953        | N=8,182        | N=59,374        | N=175,176        | N=277,221        |         |
| Maternal Age at Admission (years) | 26.55 (5.74)     | 26.72 (5.86)   | 26.24 (5.76)    | 26.36 (5.69)     | 26.74 (5.75)     | <0.001  |
| Maternal Age Category             |                  |                |                 |                  |                  | <0.001  |
| <25                               | 209,125 (40.22%) | 3,226 (39.43%) | 25,441 (42.85%) | 73,040 (41.70%)  | 107,418 (38.75%) |         |
| 25-34                             | 258,507 (49.72%) | 4,038 (49.35%) | 28,248 (47.58%) | 85,533 (48.83%)  | 140,688 (50.75%) |         |
| >=35                              | 52,321 (10.06%)  | 918 (11.22%)   | 5,685 (9.57%)   | 16,603 (9.48%)   | 29,115 (10.50%)  |         |
| Maternal Race/Ethnicity           |                  |                |                 |                  |                  | <0.001  |
| AI/AN                             | 10,988 (2.11%)   | 119 (1.45%)    | 1,416 (2.38%)   | 4,326 (2.47%)    | 5,127 (1.85%)    |         |
| Asian                             | 4,612 (0.89%)    | 63 (0.77%)     | 469 (0.79%)     | 1,563 (0.89%)    | 2,517 (0.91%)    |         |
| Black                             | 46,585 (8.96%)   | 793 (9.69%)    | 2,857 (4.81%)   | 13,634 (7.78%)   | 29,301 (10.57%)  |         |
| Hispanic                          | 40,766 (7.84%)   | 990 (12.10%)   | 6,970 (11.74%)  | 12,229 (6.98%)   | 20,577 (7.42%)   |         |
| Pacific Islander                  | 296 (0.06%)      | 4 (0.05%)      | 52 (0.09%)      | 101 (0.06%)      | 139 (0.05%)      |         |
| White                             | 401,294 (77.18%) | 5,937 (72.56%) | 45,905 (77.31%) | 138,285 (78.94%) | 211,167 (76.17%) |         |
| Other/Multiple                    | 14,628 (2.81%)   | 127 (1.55%)    | 1,640 (2.76%)   | 4,928 (2.81%)    | 7,933 (2.86%)    |         |
| Missing                           | 784 (0.15%)      | 149 (1.82%)    | 65 (0.11%)      | 110 (0.06%)      | 460 (0.17%)      |         |
| Maternal Education Category       |                  |                |                 |                  |                  | <0.001  |
| Missing                           | 4,398 (0.85%)    | 107 (1.31%)    | 499 (0.84%)     | 1,257 (0.72%)    | 2,535 (0.91%)    |         |
| No HS                             | 14,395 (2.77%)   | 365 (4.46%)    | 1,911 (3.22%)   | 5,053 (2.88%)    | 7,066 (2.55%)    |         |
| Some HS                           | 75,432 (14.51%)  | 1,267 (15.49%) | 9,991 (16.83%)  | 26,640 (15.21%)  | 37,534 (13.54%)  |         |
| HS Degree                         | 174,442 (33.55%) | 2,961 (36.19%) | 21,801 (36.72%) | 63,192 (36.07%)  | 86,488 (31.20%)  |         |
| Some College                      | 162,083 (31.17%) | 2,302 (28.13%) | 17,288 (29.12%) | 52,859 (30.17%)  | 89,634 (32.33%)  |         |
| 4 Yr College                      | 61,945 (11.91%)  | 858 (10.49%)   | 5,463 (9.20%)   | 18,783 (10.72%)  | 36,841 (13.29%)  |         |
| >4 Yrs College                    | 27,258 (5.24%)   | 322 (3.94%)    | 2,421 (4.08%)   | 7,392 (4.22%)    | 17,123 (6.18%)   |         |
| Maternal Payor Category           |                  |                |                 |                  |                  | <0.001  |
| Missing                           | 62 (0.01%)       | 0 (0.00%)      | 8 (0.01%)       | 6 (0.00%)        | 48 (0.02%)       |         |
| Private                           | 216,856 (41.71%) | 2,948 (36.03%) | 21,841 (36.79%) | 69,157 (39.48%)  | 122,910 (44.34%) |         |
| Government                        | 281,874 (54.21%) | 4,822 (58.93%) | 35,521 (59.83%) | 98,929 (56.47%)  | 142,602 (51.44%) |         |

|                                           |                  |                |                 |                 |                  |        |
|-------------------------------------------|------------------|----------------|-----------------|-----------------|------------------|--------|
| Self Pay                                  | 8,185 (1.57%)    | 160 (1.96%)    | 987 (1.66%)     | 2,820 (1.61%)   | 4,218 (1.52%)    |        |
| Other                                     | 12,976 (2.50%)   | 252 (3.08%)    | 1,017 (1.71%)   | 4,264 (2.43%)   | 7,443 (2.68%)    |        |
| Comorbidity Count                         | 0.77 (0.99)      | 0.73 (0.92)    | 0.72 (0.94)     | 0.81 (1.00)     | 0.75 (0.99)      | <0.001 |
| Comorbidity score for SMM                 | 3.40 (5.47)      | 3.12 (4.99)    | 3.12 (5.09)     | 3.66 (5.55)     | 3.30 (5.50)      | <0.001 |
| Comorbidity score for non-transfusion SMM | 4.07 (7.23)      | 3.75 (6.58)    | 3.65 (6.57)     | 4.25 (7.14)     | 4.06 (7.42)      | <0.001 |
| High Risk: Comorbidity Count >=1          |                  |                |                 |                 |                  | <0.001 |
| Low Risk                                  | 264,435 (50.86%) | 4,138 (50.57%) | 31,158 (52.48%) | 84,821 (48.42%) | 144,318 (52.06%) |        |
| 1 or more comorbidities                   | 255,518 (49.14%) | 4,044 (49.43%) | 28,216 (47.52%) | 90,355 (51.58%) | 132,903 (47.94%) |        |

**eTable 8: Characteristics of obstetric patients in the study population, based on state of residence**

|                                   | Total              | California         | Michigan           | Pennsylvania     | South Carolina   | p-value |
|-----------------------------------|--------------------|--------------------|--------------------|------------------|------------------|---------|
|                                   | N=11,543,376       | N=7,368,876        | N=1,924,318        | N=1,393,587      | N=856,595        |         |
| Maternal Age at Admission (years) | 28.39 (6.14)       | 28.76 (6.23)       | 27.86 (5.84)       | 28.08 (5.99)     | 26.98 (5.92)     | <0.001  |
| Maternal Age Category             |                    |                    |                    |                  |                  | <0.001  |
| <25                               | 3,347,542 (29.00%) | 2,015,856 (27.36%) | 589,911 (30.66%)   | 419,741 (30.12%) | 322,034 (37.59%) |         |
| 25-34                             | 6,192,051 (53.64%) | 3,925,659 (53.27%) | 1,071,192 (55.67%) | 760,979 (54.61%) | 434,221 (50.69%) |         |
| >=35                              | 2,003,783 (17.36%) | 1,427,361 (19.37%) | 263,215 (13.68%)   | 212,867 (15.27%) | 100,340 (11.71%) |         |
| Maternal Race/Ethnicity           |                    |                    |                    |                  |                  | <0.001  |
| AI/AN                             | 36,885 (0.32%)     | 25,302 (0.34%)     | 8,152 (0.42%)      | 737 (0.05%)      | 2,694 (0.31%)    |         |
| Asian                             | 1,113,609 (9.65%)  | 992,225 (13.47%)   | 67,730 (3.52%)     | 43,538 (3.12%)   | 10,116 (1.18%)   |         |
| Black                             | 1,215,809 (10.53%) | 387,974 (5.27%)    | 356,842 (18.54%)   | 193,587 (13.89%) | 277,406 (32.38%) |         |
| Hispanic                          | 4,025,149 (34.87%) | 3,742,844 (50.79%) | 131,708 (6.84%)    | 110,290 (7.91%)  | 40,307 (4.71%)   |         |
| Pacific Islander                  | 31,862 (0.28%)     | 30,980 (0.42%)     | 500 (0.03%)        | 382 (0.03%)      | 0 (0.00%)        |         |
| White                             | 4,823,479 (41.79%) | 2,031,127 (27.56%) | 1,316,755 (68.43%) | 997,680 (71.59%) | 477,917 (55.79%) |         |
| Other/Multiple                    | 283,785 (2.46%)    | 156,558 (2.12%)    | 36,613 (1.90%)     | 43,637 (3.13%)   | 46,977 (5.48%)   |         |
| Missing                           | 12,798 (0.11%)     | 1,866 (0.03%)      | 6,018 (0.31%)      | 3,736 (0.27%)    | 1,178 (0.14%)    |         |
| Maternal Education Category       |                    |                    |                    |                  |                  | <0.001  |
| Missing                           | 311,940 (2.70%)    | 272,028 (3.69%)    | 22,313 (1.16%)     | 8,350 (0.60%)    | 9,249 (1.08%)    |         |
| No HS                             | 615,539 (5.33%)    | 525,564 (7.13%)    | 42,555 (2.21%)     | 19,731 (1.42%)   | 27,689 (3.23%)   |         |
| Some HS                           | 1,600,321 (13.86%) | 1,093,053 (14.83%) | 222,220 (11.55%)   | 152,621 (10.95%) | 132,427 (15.46%) |         |
| HS Degree                         | 2,918,615 (25.28%) | 1,813,146 (24.61%) | 519,456 (26.99%)   | 372,219 (26.71%) | 213,794 (24.96%) |         |
| Some College                      | 2,943,517 (25.50%) | 1,716,359 (23.29%) | 571,385 (29.69%)   | 384,055 (27.56%) | 271,718 (31.72%) |         |
| 4 Yr College                      | 1,990,099 (17.24%) | 1,226,607 (16.65%) | 344,614 (17.91%)   | 286,768 (20.58%) | 132,110 (15.42%) |         |
| >4 Yrs College                    | 1,163,345 (10.08%) | 722,119 (9.80%)    | 201,775 (10.49%)   | 169,843 (12.19%) | 69,608 (8.13%)   |         |
| Maternal Payor Category           |                    |                    |                    |                  |                  | <0.001  |
| Missing                           | 1,345 (0.01%)      | 897 (0.01%)        | 7 (0.00%)          | 158 (0.01%)      | 283 (0.03%)      |         |
| Private                           | 5,798,266 (50.23%) | 3,591,150 (48.73%) | 1,015,234 (52.76%) | 829,713 (59.54%) | 362,169 (42.28%) |         |
| Government                        | 5,371,879 (46.54%) | 3,555,407 (48.25%) | 799,841 (41.56%)   | 548,729 (39.38%) | 467,902 (54.62%) |         |

|                                           |                    |                    |                    |                  |                  |        |
|-------------------------------------------|--------------------|--------------------|--------------------|------------------|------------------|--------|
| Self Pay                                  | 247,641 (2.15%)    | 197,453 (2.68%)    | 12,670 (0.66%)     | 14,756 (1.06%)   | 22,762 (2.66%)   |        |
| Other                                     | 124,245 (1.08%)    | 23,969 (0.33%)     | 96,566 (5.02%)     | 231 (0.02%)      | 3,479 (0.41%)    |        |
| Comorbidity Count                         | 0.81 (1.06)        | 0.75 (1.02)        | 0.95 (1.17)        | 0.84 (1.05)      | 0.94 (1.14)      | <0.001 |
| Comorbidity score for SMM                 | 3.84 (6.32)        | 3.47 (5.97)        | 4.66 (7.05)        | 4.14 (6.44)      | 4.79 (7.02)      | <0.001 |
| Comorbidity score for non-transfusion SMM | 4.77 (8.52)        | 4.31 (8.05)        | 5.77 (9.47)        | 5.19 (8.70)      | 5.83 (9.44)      | <0.001 |
| High Risk: Comorbidity Count >=1          |                    |                    |                    |                  |                  | <0.001 |
| Low Risk                                  | 5,797,093 (50.22%) | 3,871,103 (52.53%) | 870,063 (45.21%)   | 670,614 (48.12%) | 385,313 (44.98%) |        |
| 1 or more comorbidities                   | 5,746,283 (49.78%) | 3,497,773 (47.47%) | 1,054,255 (54.79%) | 722,973 (51.88%) | 471,282 (55.02%) |        |
